# Supplementary material for: Achieving high-yield and scalable synthesis of ultrastable nano graphene oxide via photochemical defect engineering and oxidative cleavage
Source: Research Square preprint supplement (doi:10.21203/rs.3.rs-8577161/v1), 2026-01-30
Supplement: Supplementary file 1 [file 9ecb29d3b0879c708748feb8.pdf]

## Supplementary Materials for

### **Achieving high-yield and scalable synthesis of ultrastable nanoscale graphene oxide via photochemical defect engineering and oxidative cleavage**

*Yuchen Yang<sup>1</sup>, Chen Ma<sup>1</sup>, Jiangbin Hong<sup>2,1</sup>, Weiming Huang<sup>2,1</sup>, Ming Lin<sup>2</sup>, Wenhua Chen<sup>1</sup>, Nanzhi Zheng<sup>1</sup>, Jingwei Xu<sup>1</sup>, Zixuan Li<sup>1</sup>, Qichuan Zhang<sup>1</sup>, Kailin Huang<sup>1</sup>, Chongqing Fang<sup>2</sup>, Liping Zhao<sup>2</sup>, Guohua Chen<sup>1,2\*</sup>*

<sup>1</sup>Graphene Powder & Composite Materials Research Center of Fujian Province, Xiamen Key Laboratory of Polymers & Electronic Materials. College of Materials Science and Engineering, Huaqiao University; Xiamen, 361021, China.

<sup>2</sup>Xiamen Knano Graphene Technology Co., Ltd; Xiamen, 361026, China.

Correspondence and requests for materials should be addressed to (email:  
[hdcgh@hqu.edu.cn](mailto:hdcgh@hqu.edu.cn))

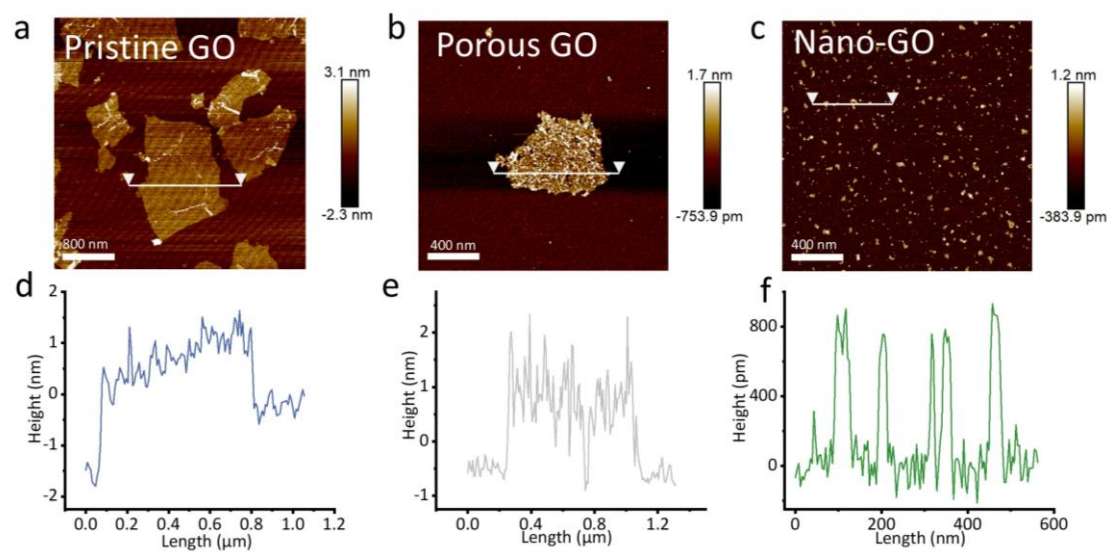

**Supplementary Figure 1. Height measurement of three types GO.** a-c, AFM images and measurement position of GO, Porous GO and Nano-GO. d-f, Height distributions of samples.

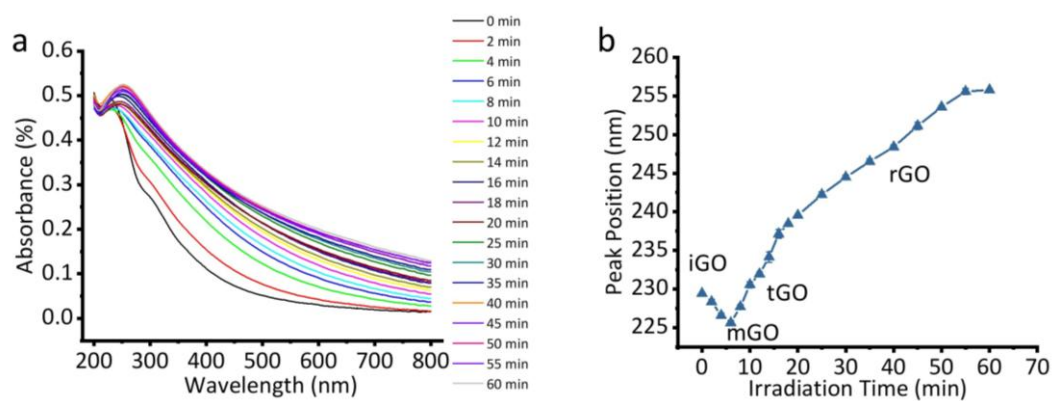

**Supplementary Figure 2. UV-Vis absorbance evolution of GO during irradiation. a,** 200-800 nm evolution of GO. **b,** Maximum absorption peak position evolution of GO.

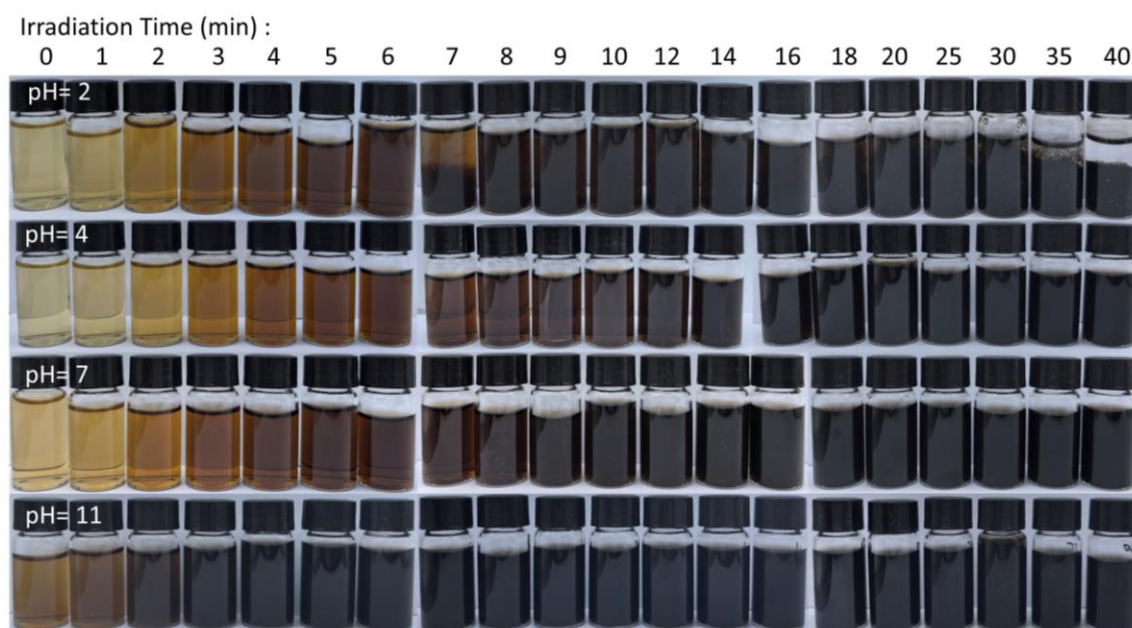

**Supplementary Figure 3. Photographs showing the evolution of GO dispersions under irradiation at different pH levels.**

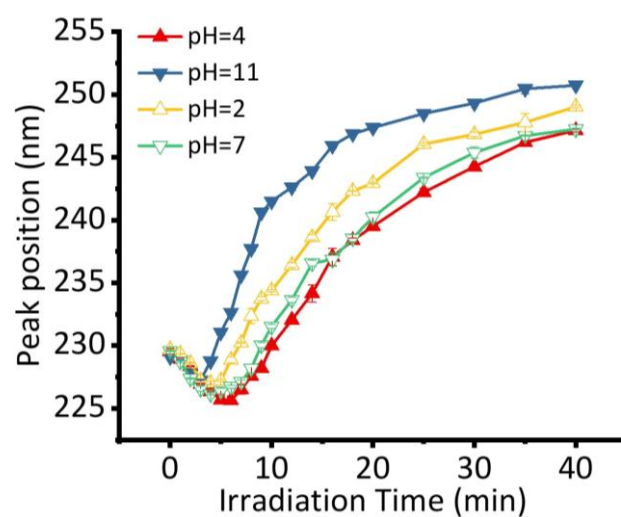

**Supplementary Figure 4. Evolution of the maximum absorbance peak of GO under irradiation at different pH levels.**

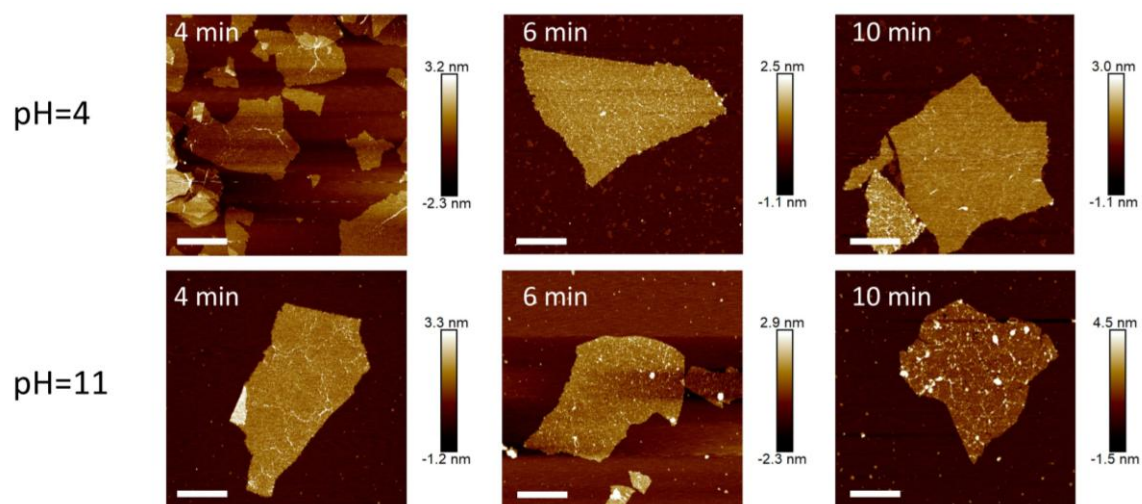

**Supplementary Figure 5. AFM images showing the evolution of GO under irradiation at pH 4 and pH 11.**

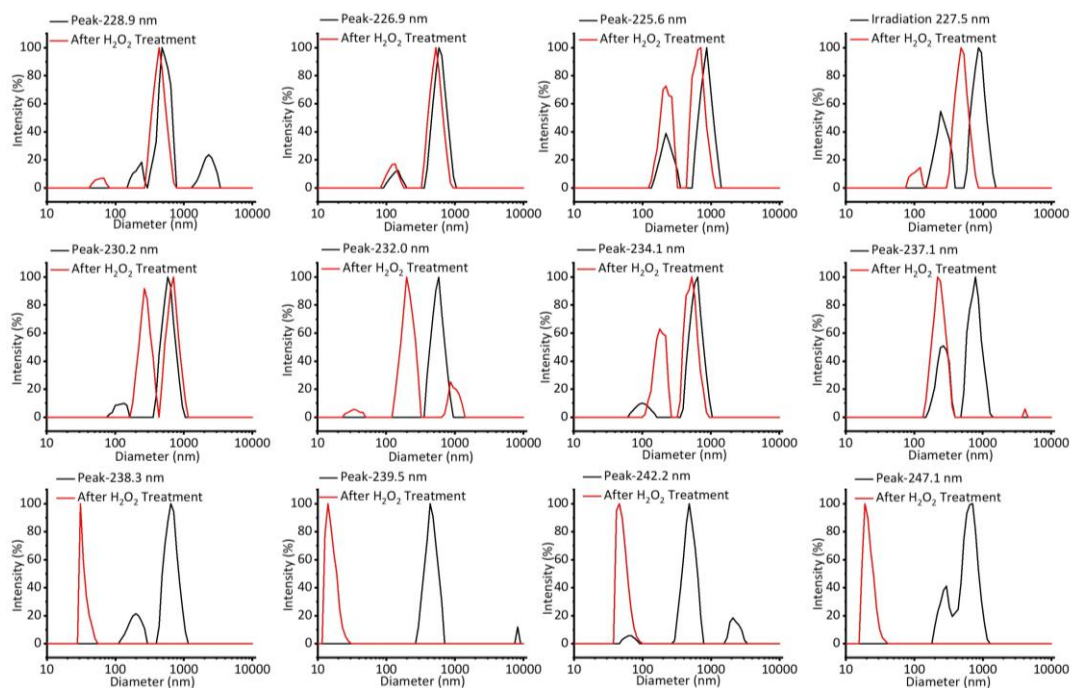

**Supplementary Figure 6. DLS measurements of GO at different irradiation levels (maximum absorbance peak position) before and after  $H_2O_2$  treatment.**

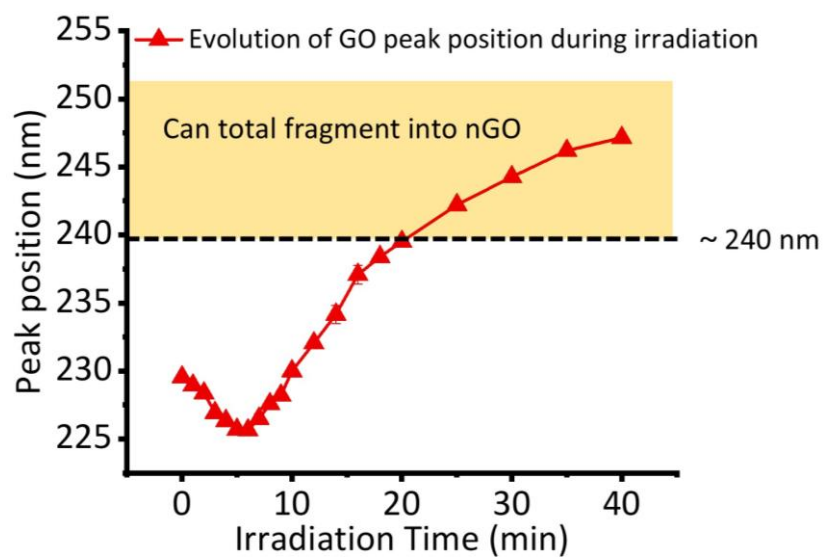

**Supplementary Figure 7. Relationship between irradiation levels (maximum absorbance peak position) and the transformation of GO to nGO.**



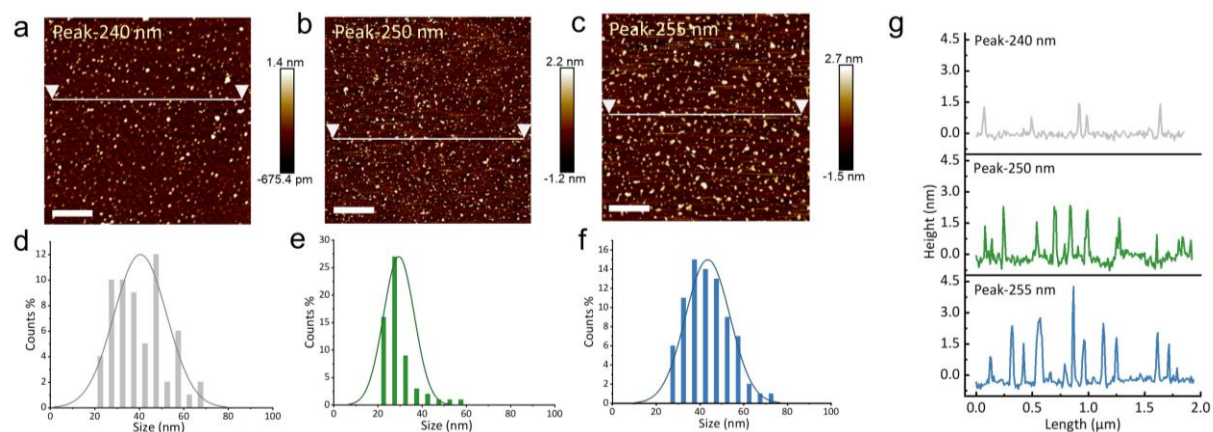

**Supplementary Figure 8. nGO prepared at different irradiation levels (maximum absorbance peak position). a-c, AFM images of sample. d-f, size distribution analysis of sample. g, Thickness of sample. Scale bars: (a-c) 400 nm.**

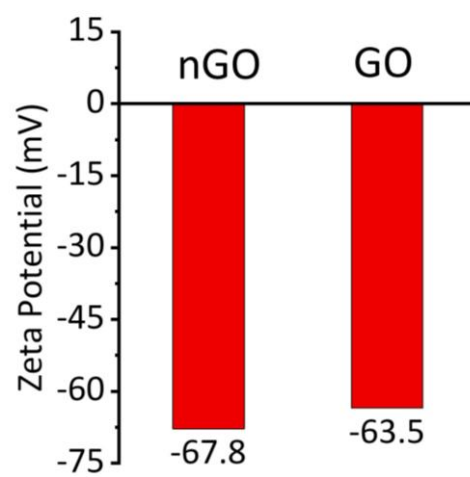

**Supplementary Figure 9. Zeta potential distribution analysis of GO and nGO.**

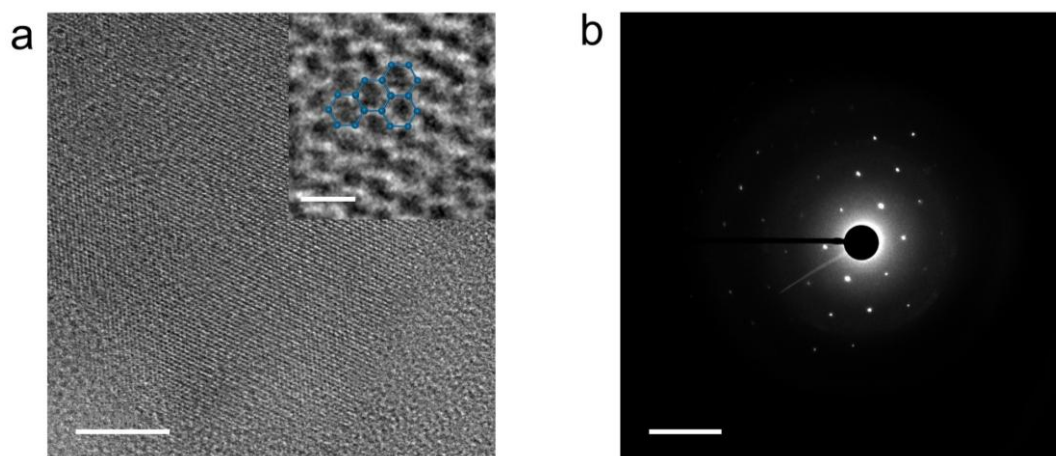

**Supplementary Figure 10. AC-TEM characterization of nGO. a,** Bright-field TEM image. **b,** Selected-area electron diffraction (SAED) pattern. Scale bars: **a** 10 nm (inset, 0.5 nm); **b** 0.5 nm.

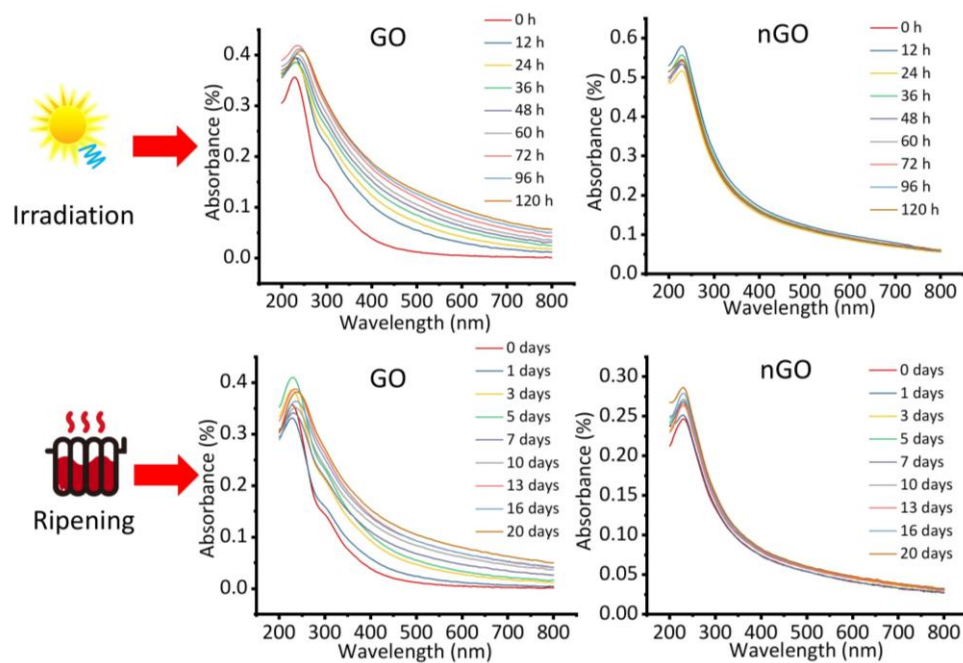

**Supplementary Figure 11. UV-Vis absorbance spectra of GO and nGO during thermal ripening and light irradiation.**

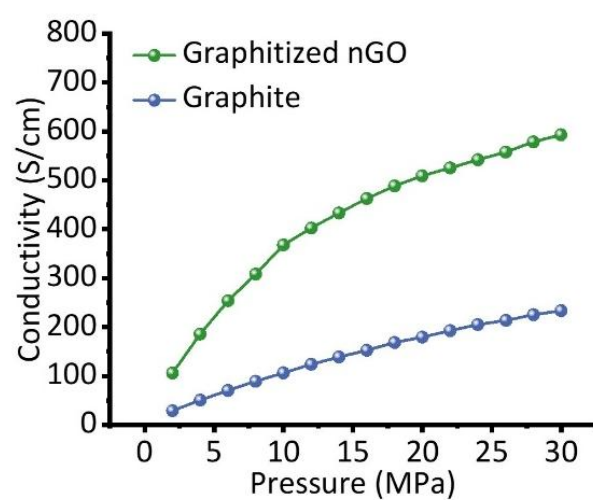

**Supplementary Figure 12. Electrical conductivity of graphitized nGO compared to pristine graphite.**

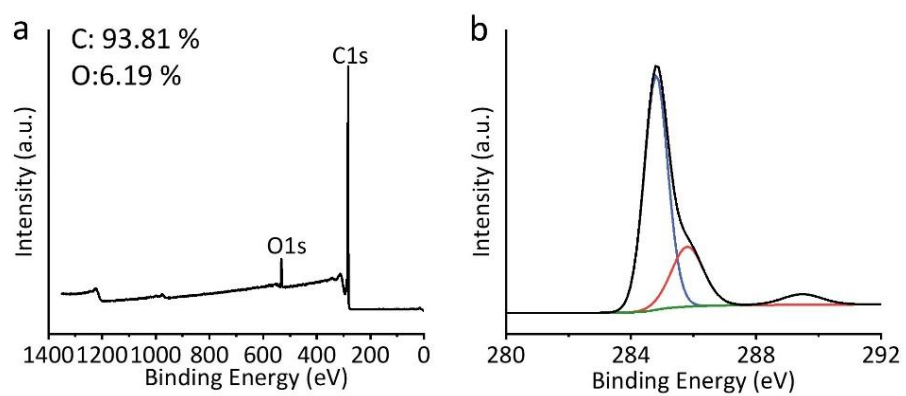

**Supplementary Figure 13. XPS characterization of graphitized nGO. a,** Survey spectrum.  
**b,** High-resolution C1s spectrum.

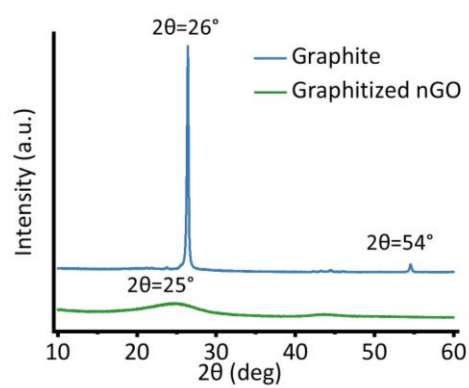

**Supplementary Figure 14. XRD result of graphitized nGO and pristine graphite.**

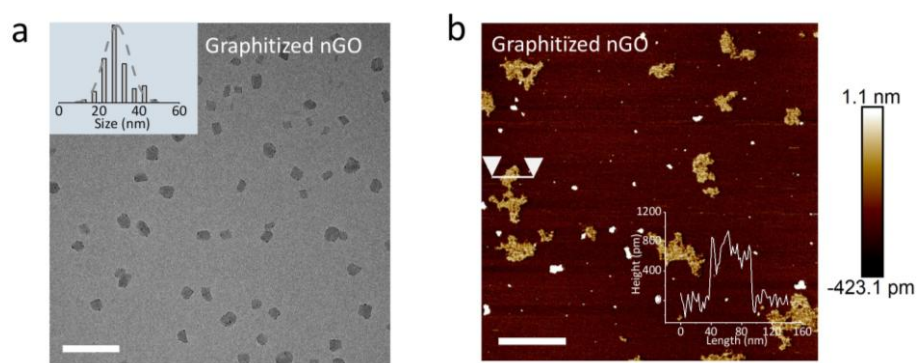

**Supplementary Figure 14. Structural characterization of graphitized nGO. a,** TEM images. **b,** AFM images. Scale bars: **(a)** 100 nm; **(b)** 200 nm.



**Supplementary Table 1. Conductivity of GO and nGO after chemical and thermal reduction.**

|            | Pristine              | NaBH <sub>4</sub>     | Ascorbic<br>acid<br>(VC) | N <sub>2</sub> H <sub>4</sub> ·H <sub>2</sub> O | HI-AcOH               | H <sub>2</sub> /Ar   |
|------------|-----------------------|-----------------------|--------------------------|-------------------------------------------------|-----------------------|----------------------|
| GO (S/cm)  | 1.04×10 <sup>-3</sup> | 1.56×10 <sup>-1</sup> | 6.09                     | 2.5×10 <sup>1</sup>                             | 1×10 <sup>2</sup>     | 1.42×10 <sup>2</sup> |
| nGO (S/cm) | 6.98×10 <sup>-5</sup> | 2.14×10 <sup>-4</sup> | 5.22×10 <sup>-4</sup>    | 5.22×10 <sup>-4</sup>                           | 1.20×10 <sup>-3</sup> | 1.67                 |

**Supplementary Video 1.** Filtration test of GO

5ml of 0.2 mg/ml GO solution in the syringe is fixed on the iron frame, and the push rod applies a force of 20 N vertically downwards. The GO solution could not through the 0.22  $\mu$ m membrane. Play speed is 1X.

**Supplementary Video 2.** Filtration test of nGO

The same measurement and concentration of nGO filtration test, but nGO could gently pass through the membrane. Play speed is 1X.
